# Supplementary material for: Conductive porphyrin helix from ternary self-assembly systems
Source: Royal Society of Chemistry journal article supplement (doi:10.1039/c4cc05719h), 2014-01-01
Supplement: c4cc05719h1.pdf [file c4cc05719h1.pdf]

## Supporting Information

### Conductive Porphyrin Helix from Ternary Self-assembly Systems

Qiang Zhao,<sup>a,b</sup> Yao Wang,<sup>a,c</sup> Yan Qiao,<sup>a,b</sup> Xiaolong Wang,<sup>a,b</sup> Xuefeng Guo,<sup>a,b</sup> Yun Yan<sup>\*a,b</sup> and Jianbin Huang<sup>\*a,b</sup>

<sup>a</sup> Beijing National Laboratory for Molecular Sciences (BNLMS), College of Chemistry and Molecular Engineering, Peking University, Beijing 100871, People's Republic of China, E-mail: JBHuang@pku.edu.cn;

<sup>b</sup> State Key Laboratory for Structural Chemistry of Unstable and Stable Species, Peking University, Beijing 100871, People's Republic of China;

<sup>c</sup> Key Laboratory of Polymer Chemistry and Physics of the Ministry of Education, Peking University, Beijing 100871, People's Republic of China.

#### Experimental Section

**Materials and Methods.** The tetrasodium meso-tetra(sulfonatophenyl)porphine (TPPS<sub>4</sub>, >97.0%) and dodecyldimethylamine oxide (C<sub>12</sub>DMAO, 95.0%) were purchased from Alfa Aesar. Tetradecyldimethylamine oxide (C<sub>14</sub>DMAO) was prepared by freeze drying 70.0% aqueous solution, followed by recrystallizing more than five times from acetone. All the other reagents were purchased from Beijing Chemical Reagents (Beijing, China, >99.0%). The purities of the surfactants were examined by the lack of minima in their surface tension curves. Aqueous solutions were prepared using Milli-Q water (Millipore, 18 MΩ/cm resistivity). The helical structures were prepared through mild process. TPPS<sub>4</sub> (1.0 × 10<sup>-4</sup> M), Zn(NO<sub>3</sub>)<sub>2</sub> (1.0 ×

$10^{-4}$  M) and  $C_{14}$ DMAO ( $2.0 \times 10^{-4}$  M) were mixed together in aqueous solution. After 3 days undisturbed in dark at  $25^{\circ}\text{C}$ , the precipitate suspended in solution were collected.

**Characterization of Helical Nanostructures.** The helical structures were characterized by scanning electron microscopy (SEM, Hitachi S4800, 5 kV), confocal laser scan microscopy (CLSM, Nikon A1R-si), transmission electron microscopy (TEM, JEM-100CX, 100 kV), ultraviolet-visible spectrophotometry (UV-Vis, Beijing Purkinje General Instrument Co., LTD. TU-1810), fluorescence spectrophotometer (Hitachi F7000), X-ray photoelectron spectroscopy (XPS, Axis Ultra, Kratos Analytical Ltd.), isothermal titration microcalorimetry (ITC, Thermometric AB, Jarfalla, Sweden), fourier transform infrared spectrophotometry (FT-IR, Bruker Tensor 27) and X-ray diffraction (XRD, Rigaku Dmax-2000, Ni-filtered  $\text{Cu K}\alpha$  radiation). Except ITC test, all the other measurements were conducted under ambient conditions at room temperature.

For SEM and TEM measurements, a drop of suspension was placed on clean silicon sheets or copper grids and then dried freely under ambient conditions. For UV-Vis measurements, the precipitates in deionized water were used. The ITC test was taken in a TAM 2277-201 microcalorimetric system with a 1 mL sample at the desired temperature  $T \pm 0.01^{\circ}\text{C}$ . For FT-IR, dry powder of precipitates was examined with micro-attenuated total reflection (ATR) method. For XPS and XRD measurements, several drops of the suspension were dropped on a clean glass slide, followed by drying in the air.

**Preparation of Gold Electrodes.** The gold electrodes were prepared by thermal evaporation of gold through a shadow mask on silicon wafer. The silicon wafer was doped with 300 nm thick oxidized silicon on the surface. The gold electrodes were separated by  $\sim 20 \mu\text{m}$  (Figure 2b). Then a drop of TPPS<sub>4</sub>/Zn(NO<sub>3</sub>)<sub>2</sub>/C<sub>14</sub>DMAO solution was poured over the electrodes, and the solvent evaporated at room temperature. This process transferred single helix onto substrate, some of which bridged across the micro-fabricated gold electrodes.

For the calculation of conductivity, as shown in figure 2c, the helix length  $L$  and cross sectional area  $S$  are  $26.6 \mu\text{m}$  and  $1.18 \times 10^{-13} \text{ m}^2$ , respectively. Meanwhile, the value of  $I/V$  is calculated to be  $1.75 \times 10^{-9} \text{ S}$  from figure 2c. Hence, the room temperature conductivity of TPPS<sub>4</sub>/Zn(NO<sub>3</sub>)<sub>2</sub>/C<sub>14</sub>DMAO helix is supposed to be  $\sigma_{\text{RT}} = 3.95 \times 10^{-5} \text{ S cm}^{-1}$ .

## Supplymental Results

### 1. SEM image and diameter distribution of helix.

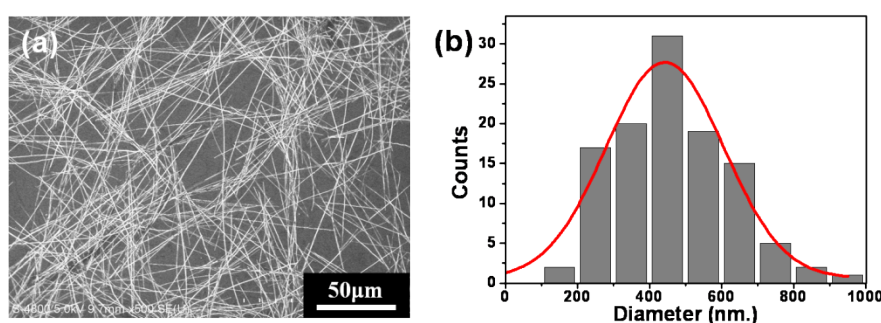

**Figure S1.** (a) SEM images of complex deposited from solution onto silicon slice. Scale bar = 50  $\mu\text{m}$ . (b) Distribution of helices in diameter. Helices were achieved in the solution of TPPS<sub>4</sub>/Zn(NO<sub>3</sub>)<sub>2</sub>/C<sub>14</sub>DMAO at the ratio of 1/1/2 ( $C_{\text{TPPS}_4} = 1.0 \times 10^{-4} \text{ M}$ ).

## 2. TEM image of helix.

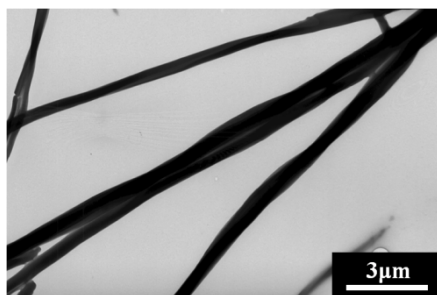

**Figure S2.** The TEM image of helices in the solution of TPPS<sub>4</sub>/Zn(NO<sub>3</sub>)<sub>2</sub>/C<sub>14</sub>DMAO without negative staining. Scale bar = 3  $\mu\text{m}$ . The ratio of TPPS<sub>4</sub>/Zn(NO<sub>3</sub>)<sub>2</sub>/C<sub>14</sub>DMAO is 1/1/2 ( $C_{\text{TPPS}_4} = 1.0 \times 10^{-4} \text{ M}$ ).

## 3. CLSM image of helix in aqueous solution.

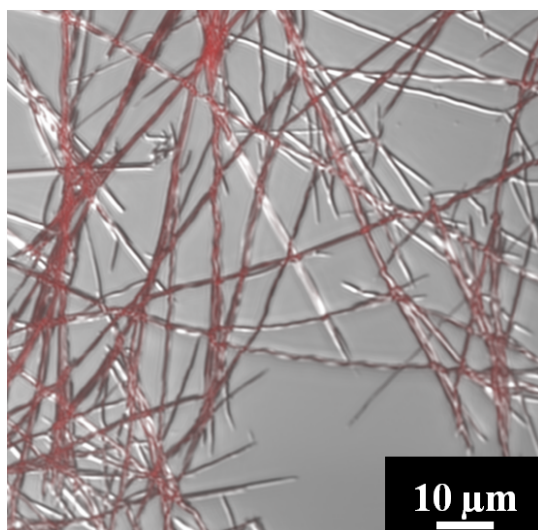

**Figure S3.** Optical and fluorescent overlapping image of helix in aqueous solution. Scale bar = 10  $\mu\text{m}$ . The ratio of  $\text{TPPS}_4/\text{Zn}(\text{NO}_3)_2/\text{C}_{14}\text{DMAO}$  is 1/1/2 ( $C_{\text{TPPS}_4} = 1.0 \times 10^{-4} \text{ M}$ ).

#### 4. Fluorescent properties of helix.

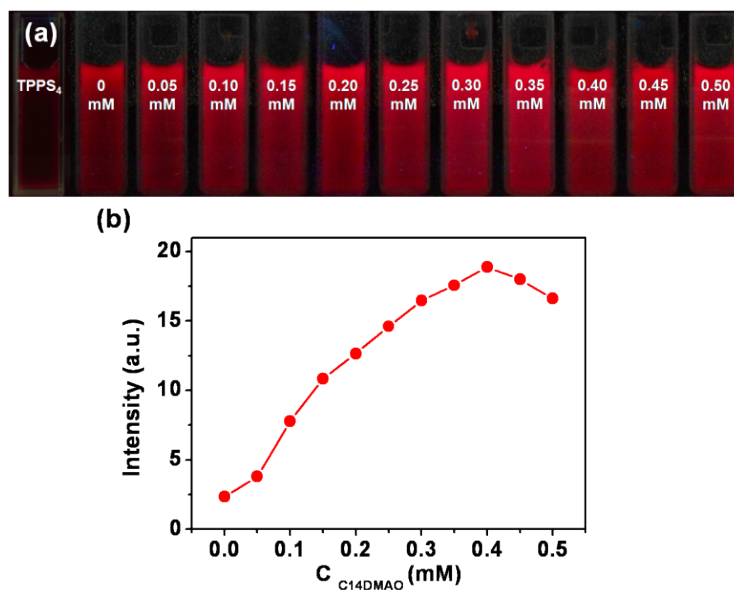

**Figure S4.** (a) The photo under UV-light irradiation of  $\text{TPPS}_4$  and  $\text{TPPS}_4/\text{Zn}(\text{NO}_3)_2$  upon addition of  $\text{C}_{14}\text{DMAO}$  ( $0 - 5.0 \times 10^{-4} \text{ M}$ ) at 365 nm. (b) The fluorescent intensity changes at 648 nm of  $\text{TPPS}_4/\text{Zn}(\text{NO}_3)_2$  upon addition of  $\text{C}_{14}\text{DMAO}$  ( $0 - 5.0 \times 10^{-4} \text{ M}$ ) in aqueous solution at 25°C,  $\text{TPPS}_4/\text{Zn}(\text{NO}_3)_2 = 1/1$ ,  $C_{\text{TPPS}_4} = 1.0 \times 10^{-4} \text{ M}$ .

#### 5. Turbidity of helix.

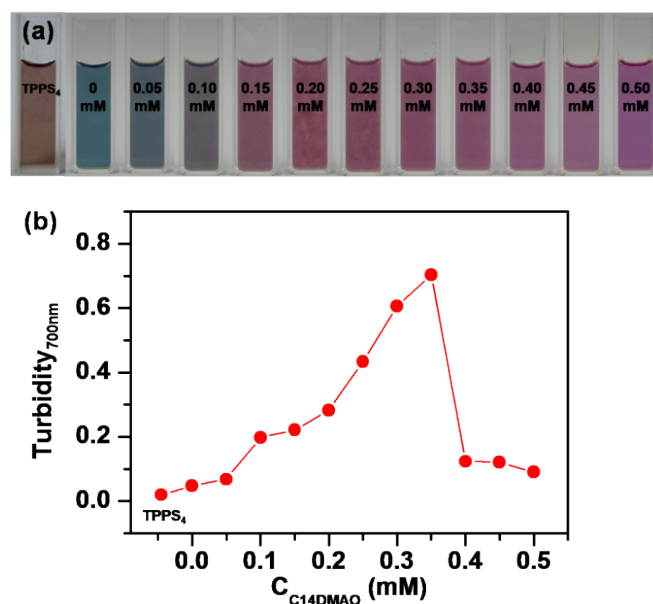

**Figure S5.** (a) The photo under the daylight, and (b) turbidity changes at 700 nm of TPPS<sub>4</sub> and TPPS<sub>4</sub>/Zn(NO<sub>3</sub>)<sub>2</sub> upon addition of C<sub>14</sub>DMAO (0 - 5.0 × 10<sup>-4</sup> M) in aqueous solution at 25°C, TPPS<sub>4</sub>/Zn(NO<sub>3</sub>)<sub>2</sub> = 1/1, C<sub>TPPS4</sub> = 1.0 × 10<sup>-4</sup> M.

## 6. XRD patterns.

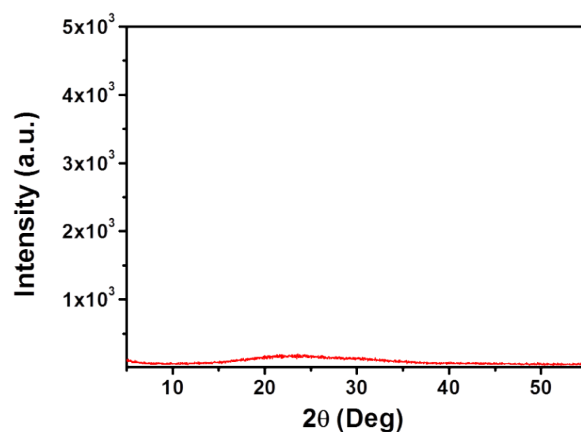

**Figure S6.** XRD patterns of the helix at 2theta ranging from 5° to 55° on glass sheet. The helix was made in TPPS<sub>4</sub>/Zn(NO<sub>3</sub>)<sub>2</sub>/C<sub>14</sub>DMAO solution.

## 7. Structure model for molecular arrangement of helix.

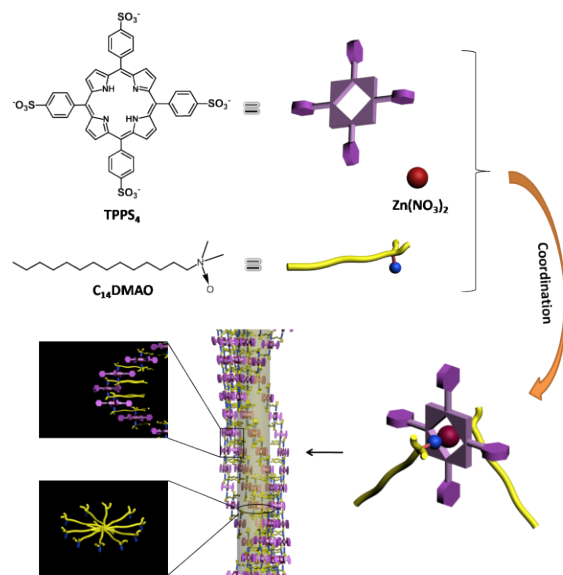

**Figure S7.** A possible model for the molecular arrangement of TPPS<sub>4</sub>/Zn(NO<sub>3</sub>)<sub>2</sub>/C<sub>14</sub>DMAO helical nanostructure.

## 8. Properties of helix in TPPS<sub>4</sub>/Zn(NO<sub>3</sub>)<sub>2</sub>/C<sub>12</sub>DMAO system.

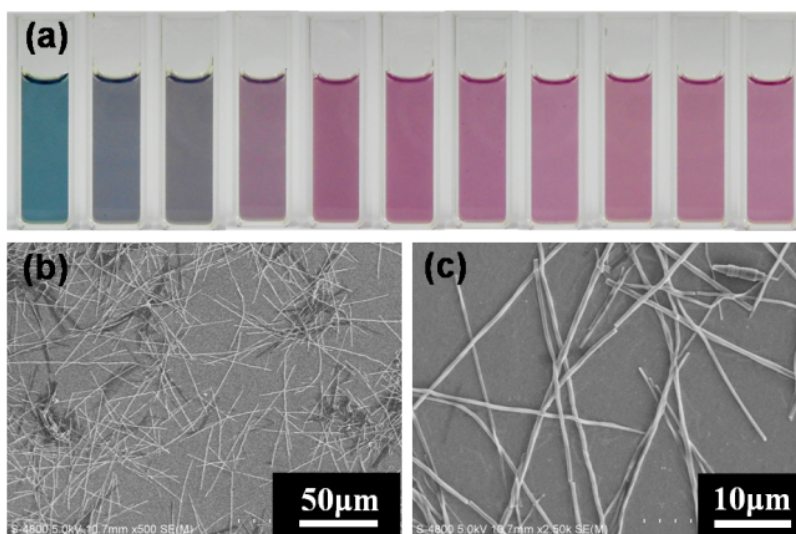

**Figure S8.** (a) The photo of TPPS<sub>4</sub>/Zn(NO<sub>3</sub>)<sub>2</sub> upon addition of C<sub>12</sub>DMAO (0 - 5.0 × 10<sup>-4</sup> M) in aqueous solution under the daylight at 25°C. TPPS<sub>4</sub>/Zn(NO<sub>3</sub>)<sub>2</sub> = 1/1, C<sub>TPPS<sub>4</sub></sub> = 1.0 × 10<sup>-4</sup> M. (b), (c) SEM images for TPPS<sub>4</sub>/Zn(NO<sub>3</sub>)<sub>2</sub>/C<sub>12</sub>DMAO helices. Helices were achieved in the solution of TPPS<sub>4</sub>/Zn(NO<sub>3</sub>)<sub>2</sub>/C<sub>12</sub>DMAO system. The ratio of TPPS<sub>4</sub>/Zn(NO<sub>3</sub>)<sub>2</sub>/C<sub>12</sub>DMAO is 1/1/2 (C<sub>TPPS<sub>4</sub></sub> = 1.0 × 10<sup>-4</sup> M).
